# Supplementary material for: Social impact of brain fog and analysis of risk factors: Long COVID in Japanese population
Source: PubMed Central journal article supplement — Ann Clin Transl Neurol. 2024 Jul 4;11(8):2188–200. doi: 10.1002/acn3.52139 (PMC11330230; doi:10.1002/acn3.52139), 2024-07-04

Figure S4. Risk of developing combination of two posterior symptoms during hospitalization in patients with poor concentration at either 3,6 or 12 months

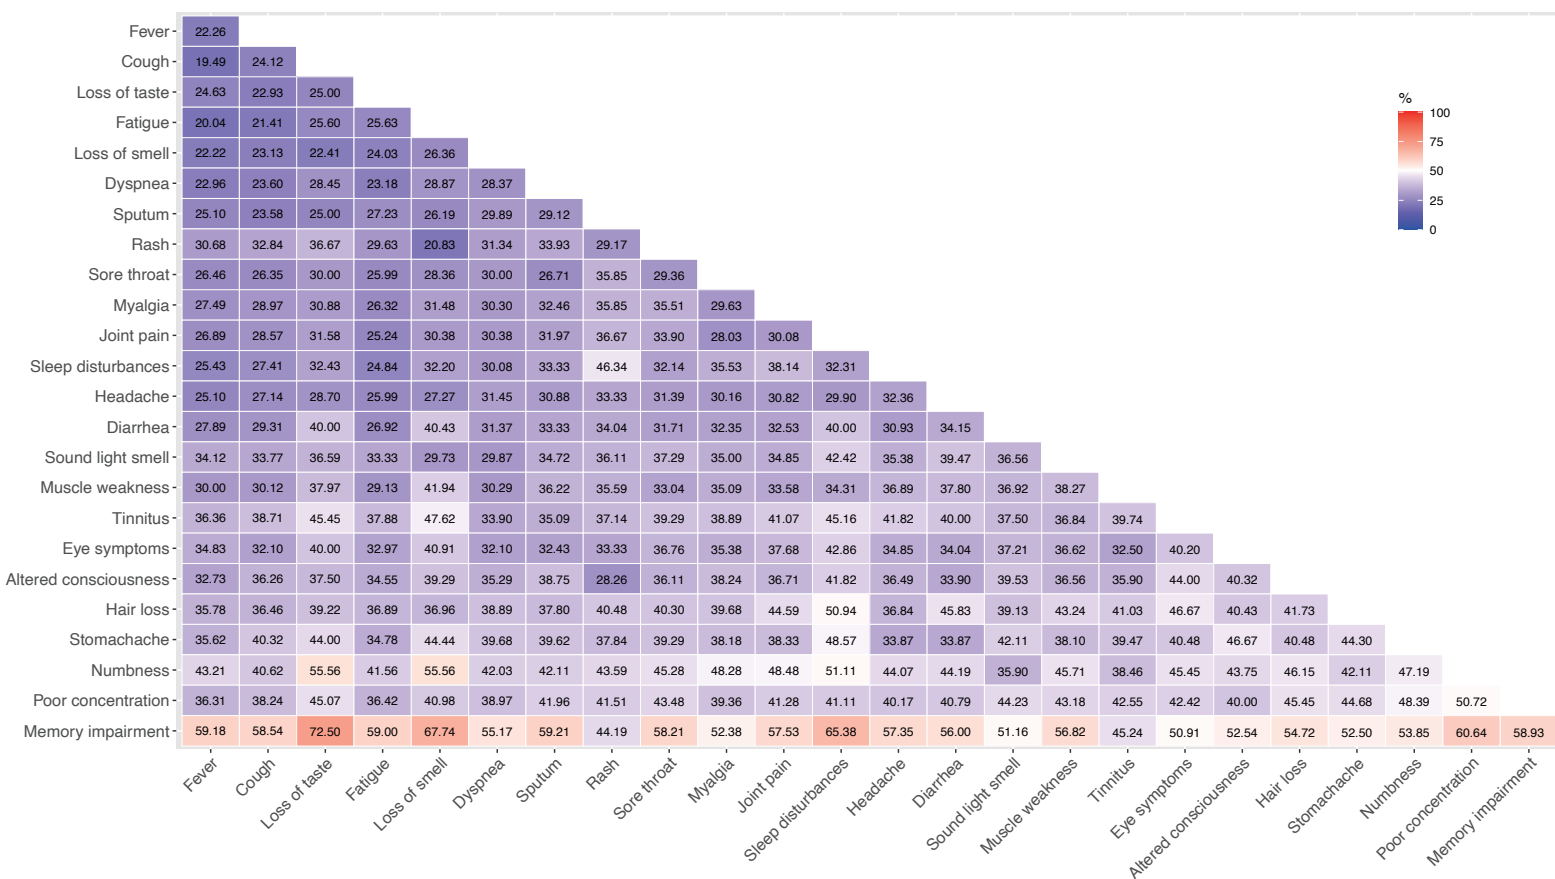

Supplement: ACN3-11-2188-s004.pdf [file ACN3-11-2188-s004.pdf]
