# Supplementary figures and images for: Social impact of brain fog and analysis of risk factors: Long COVID in Japanese population
Source: PubMed Central journal article supplement — Ann Clin Transl Neurol. 2024 Jul 4;11(8):2188–200. doi: 10.1002/acn3.52139 (PMC11330230; doi:10.1002/acn3.52139), 2024-07-04

Figure S1. The flow diagram of this study

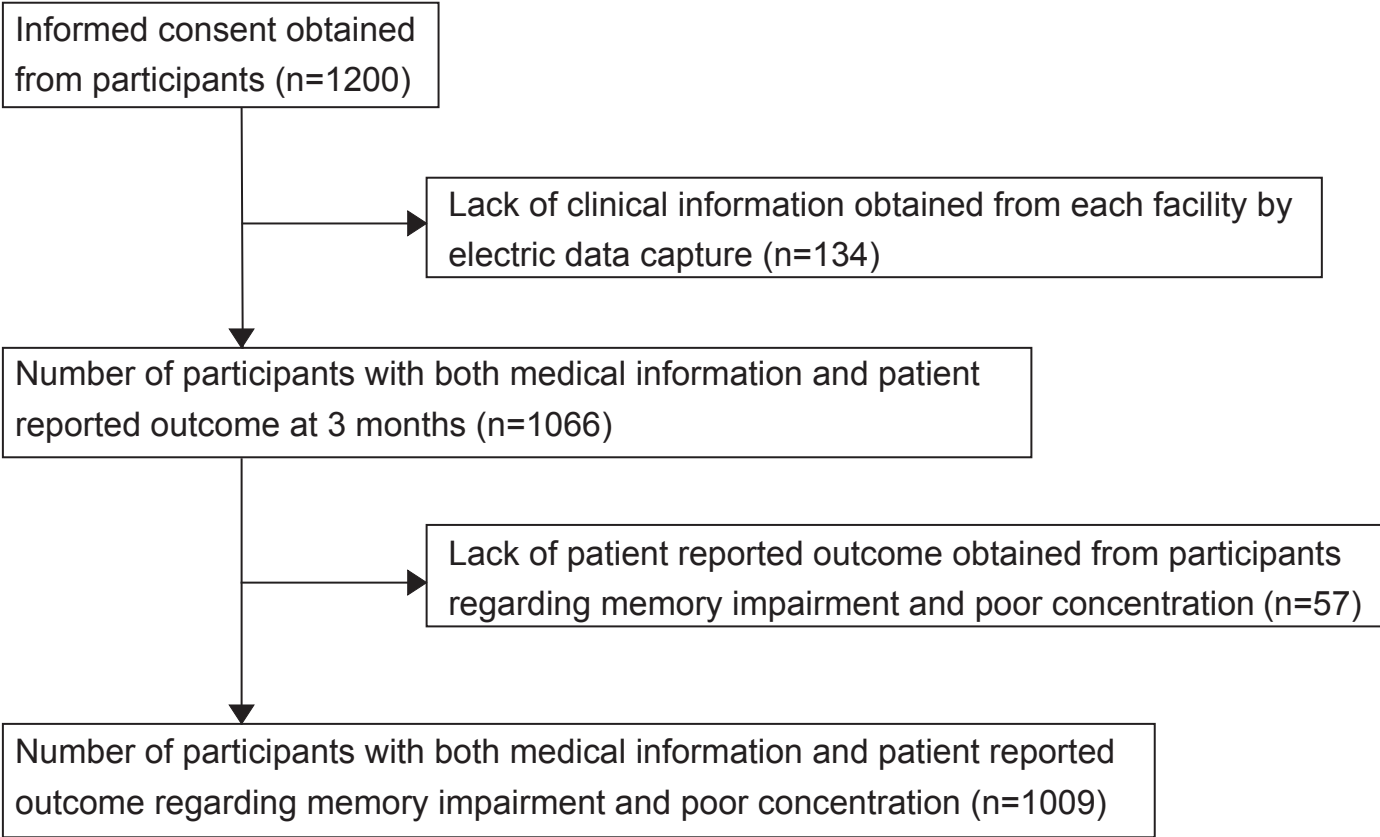

Supplement: ACN3-11-2188-s008.pdf [file ACN3-11-2188-s008.pdf]

Figure S2. The frequency of 22 symptoms, categorized by the presence or absence of brain fog

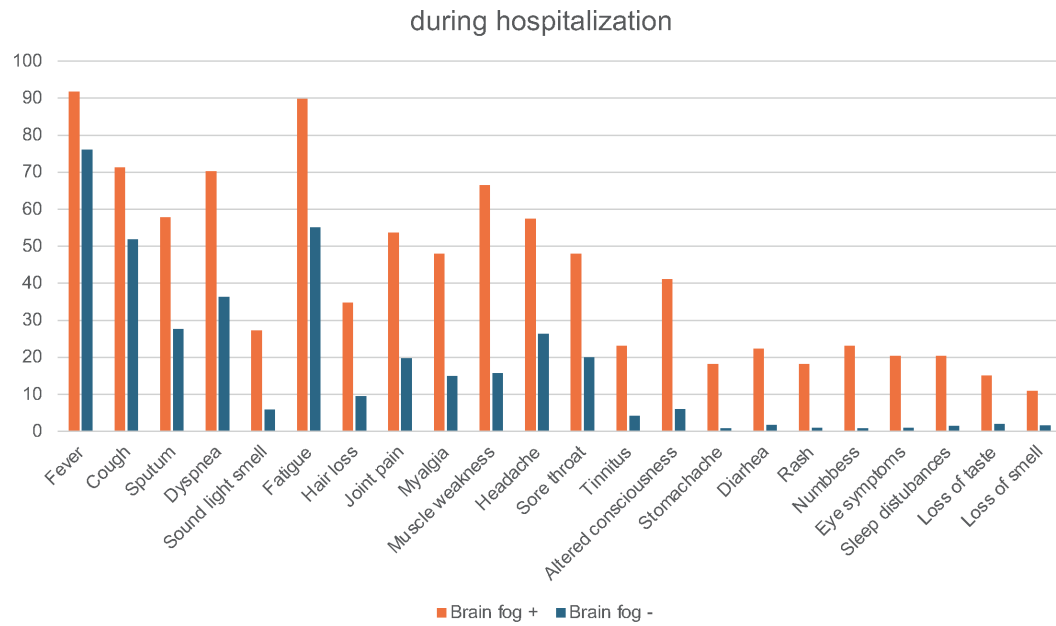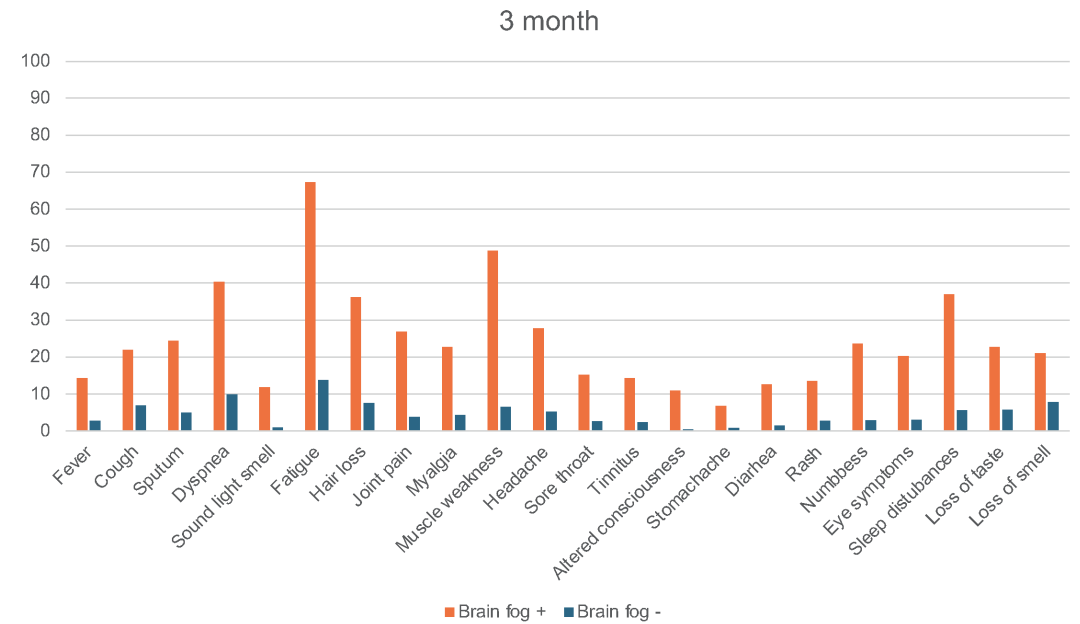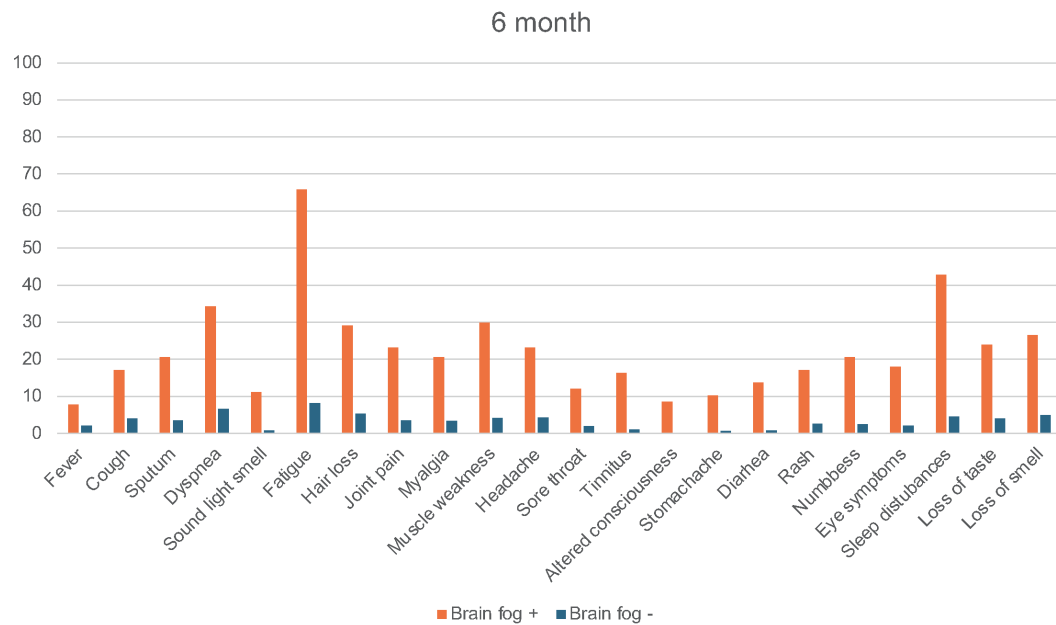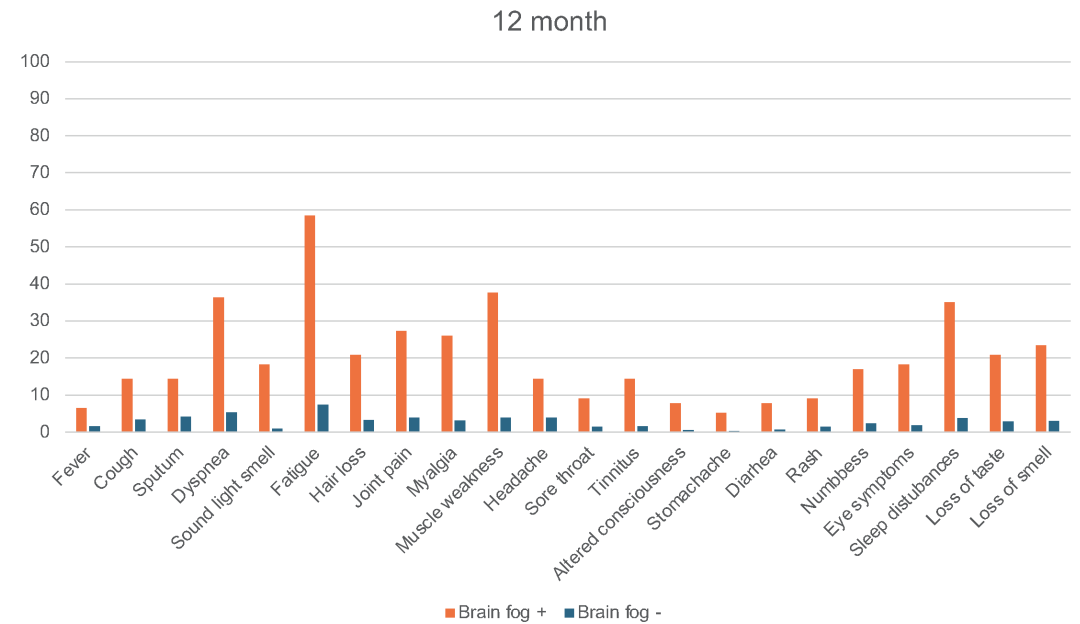

Supplement: ACN3-11-2188-s010.pdf [file ACN3-11-2188-s010.pdf]
